1 **Single mutation at a highly conserved region of chloramphenicol**  
2 **acetyltransferase enables thermophilic isobutyl acetate production directly**  
3 **from cellulose by *Clostridium thermocellum***

4 Hyeonmin Seo<sup>1,3,#</sup>, Jong-Won Lee<sup>2,3,#</sup>, Sergio Garcia<sup>1,3</sup> and Cong T. Trinh<sup>1,2,3,§</sup>

5

6 <sup>1</sup>Department of Chemical and Biomolecular Engineering, The University of Tennessee, Knoxville,  
7 TN, USA

8 <sup>2</sup>Bredesen Center for Interdisciplinary Research and Graduate Education, The University of  
9 Tennessee, Knoxville, TN, USA

10 <sup>3</sup>Center for Bioenergy Innovation (CBI), Oak Ridge National Laboratory, Oak Ridge, TN, USA

11

12 #Equal contributions

13 §Corresponding author. Email: [ctrinh@utk.edu](mailto:ctrinh@utk.edu); Tel: 865-974-8121; Fax: 865-974-7076

14

15

## 16 ABSTRACT

17 **Background.** Esters are versatile chemicals and potential drop-in biofuels. To develop a  
18 sustainable production platform, microbial ester biosynthesis using alcohol acetyltransferases  
19 (AATs) has been studied for decades. Volatility of esters endows thermophilic production with  
20 advantageous downstream product separation. However, due to the limited thermal stability of  
21 AATs known, the ester biosynthesis has largely relied on use of mesophilic microbes. Therefore,  
22 developing thermostable AATs is important for thermophilic ester production directly from  
23 lignocellulosic biomass by the thermophilic consolidated bioprocessing (CBP) microbes, e.g.,  
24 *Clostridium thermocellum*.

25 **Results.** In this study, we engineered a thermostable chloramphenicol acetyltransferase from  
26 *Staphylococcus aureus* (CAT<sub>Sa</sub>) for enhanced isobutyl acetate production at elevated temperature.  
27 We first analyzed the broad alcohol substrate range of CAT<sub>Sa</sub>. Then, we targeted a highly  
28 conserved region in the binding pocket of CAT<sub>Sa</sub> for mutagenesis. The mutagenesis revealed that  
29 F97W significantly increased conversion of isobutanol to isobutyl acetate. Using CAT<sub>Sa</sub> F97W,  
30 we demonstrated the engineered *C. thermocellum* could produce isobutyl acetate directly from  
31 cellulose.

32 **Conclusions.** This study highlights that CAT is a potential thermostable AAT that can be  
33 harnessed to develop the thermophilic CBP microbial platform for biosynthesis of designer  
34 bioesters directly from lignocellulosic biomass.

35

36 **Keywords:** Alcohol acetyltransferase; thermostability; chloramphenicol acetyltransferase;  
37 isobutyl acetate; esters; consolidated bioprocessing; *Clostridium thermocellum*.

38

## 39 **Introduction**

40 Esters are versatile chemicals which have been used as lubricants, solvents, food additives,  
41 fragrances and potential drop-in fuels [1]. Currently, ester production largely relies on synthesis  
42 from petroleum or extraction from plants, which makes it neither sustainable nor economically  
43 feasible. Therefore, microbial production of esters has been studied for decades [2-7]. Most studies  
44 have employed an alcohol acetyltransferase (E.C. 2.3.1.84, AAT), belonging to a broad  
45 acetyltransferase class, that can synthesize a carboxylic ester by condensing an alcohol and an  
46 acyl-CoA in a thermodynamically favorable aqueous environment [5]. For example, an  
47 *Escherichia coli*, engineered to use this biosynthetic pathway, could achieve high titer of isobutyl  
48 acetate [6, 7]. With appropriate expression of AATs and availability of alcohol and acyl-CoA  
49 moieties, various types of esters can be produced [2, 4]. Due to high volatility of esters, ester  
50 production at elevated temperature can benefit downstream product separation and hence reduce  
51 the process cost. Interestingly, it has recently been shown that for the same total carbon chain  
52 length, short-chain esters are less toxic to microbial health than alcohols, which is potentially  
53 beneficial for ester fermentation [8]. However, most of the AATs known to date are isolated from  
54 mesophilic microbes or plants, and none of them has been reported to be active at elevated  
55 temperatures ( $> 50^{\circ}\text{C}$ ). The highest temperature reported for ester production is  $42^{\circ}\text{C}$  in a  
56 thermotolerant yeast [9]. Hence, finding and developing a thermostable AAT is crucial to produce  
57 esters at elevated temperature.

58 Chloramphenicol acetyltransferase (E.C. 2.3.1.28, CAT) is another acetyltransferase class  
59 that has been found in various microbes [10]. This enzyme acetylates chloramphenicol, a protein  
60 synthesis inhibitor, by transferring the acetyl group from acetyl-CoA. The acetylation of  
61 chloramphenicol detoxifies the antibiotic compound and confers chloramphenicol resistance in

62 bacteria. Recent studies have implied that CATs likely recognize a broad substrate range for  
63 alcohols and acyl-CoAs [7]. In addition, high thermal stability of some CATs enables them to be  
64 used as selection markers in thermophiles [11-13]. Therefore, CAT can function or be repurposed  
65 as a thermostable AAT suitable for ester biosynthesis at elevated temperature.

66 In this study, we engineered a CAT from *Staphylococcus aureus* (CAT<sub>Sa</sub>) for thermophilic  
67 isobutyl acetate production. First, we investigated a broad alcohol substrate range of CAT<sub>Sa</sub>.  
68 Protein homology modeling along with sequence alignment were performed to identify the binding  
69 pocket of CAT<sub>Sa</sub> as a potential target for protein engineering to enhance condensation of isobutanol  
70 and acetyl-CoA. *In silico* mutagenesis successfully discovered a variant (F97W) of CAT<sub>Sa</sub> that was  
71 then experimentally validated for improved catalytic activity towards isobutanol. As a proof of  
72 concept, the engineered CAT<sub>Sa</sub> was successfully expressed in *Clostridium thermocellum*. We  
73 demonstrated the F97W CAT<sub>Sa</sub>-overexpressing for consolidated bioprocessing (CBP) to produce  
74 isobutyl acetate directly from cellulose without a need for external supply of cellulases. To our  
75 knowledge, this study presents the first demonstration of CAT engineering to enable thermophilic  
76 ester production directly from cellulose.

77

## 78 **Results and discussion**

### 79 ***In silico* and rapid *in vivo* characterization of a thermostable chloramphenicol** 80 **acetyltransferase(s) for broad alcohol substrate range**

81 To develop a thermophilic microbial ester production platform, a thermostable AAT is  
82 required. Unfortunately, the AATs known to date are isolated from mesophilic yeasts or plants,  
83 and none of them has been reported to be active at a temperature above 50°C. To tackle this  
84 problem, we chose CATs to investigate their potential functions as a thermostable AAT because

85 some thermophilic CATs have been successfully used as a selection marker in thermophiles [13-  
86 17] and others have been shown to perform the acetylation for not only chloramphenicol but  
87 various alcohols like AATs [18-21] [7] (Figure 1A, S1A). As a proof-of-study, we investigated  
88 CAT<sub>sa</sub>, classified as Type A-9, from the plasmid pNW33N for a broad range of alcohol substrates  
89 as it has been widely used for genetic engineering in *C. thermocellum* at elevated temperature ( $\geq$   
90 50°C) [13-15].

91 We first conducted alcohol docking simulations using the homology model. Remarkably,  
92 the model predicted binding affinities of short-to-medium chain length alcohols (e.g., ethanol,  
93 propanol, isopropanol, butanol, and isobutanol) and aromatic alcohols (e.g., benzyl alcohol and  
94 phenethyl alcohol) to the binding pocket. The change in the protein's Gibbs free energy upon the  
95 substrate binding was ordered as follows: 2-phenethyl alcohol > benzyl alcohol > isobutanol >  
96 butanol > propanol > ethanol > isopropanol (Figure 1B).

97 To quickly evaluate the *in silico* docking simulation results experimentally, we next  
98 performed *in vivo* characterization of a CAT<sub>sa</sub>-overexpressing *E. coli* and screened for acetate  
99 esters production. Acetyl-CoA was derived from glycolysis while various alcohols were externally  
100 supplied to the media. Remarkably, the results exhibited the same trends of specificities of CAT<sub>sa</sub>  
101 towards alcohols as predicted by the *in silico* docking simulation (Figure 1B). The CAT<sub>sa</sub>-  
102 overexpressing *E. coli* produced all the expected acetate esters including ethyl acetate, propyl  
103 acetate, isopropyl acetate, butyl acetate, isobutyl acetate, benzyl acetate, and 2-phenethyl acetate  
104 at titers of  $1.12 \pm 0.07$ ,  $2.30 \pm 0.28$ ,  $0.08 \pm 0.02$ ,  $9.75 \pm 1.57$ ,  $17.06 \pm 6.04$ ,  $152.44 \pm 29.50$ , and  
105  $955.27 \pm 69.50$  mg/L and specific ester production rates of  $0.02 \pm 0.00$ ,  $0.05 \pm 0.01$ ,  $0.00 \pm 0.00$ ,  
106  $0.19 \pm 0.03$ ,  $0.34 \pm 0.12$ ,  $3.02 \pm 0.57$ , and  $19.27 \pm 1.32$  mg/gDCW/h, respectively. We observed  
107 that the specific ester production titers and rates are higher for aromatic alcohols than linear, short-

108 chain alcohols likely because the hydrophobic binding pocket of CAT<sub>Sa</sub> has been evolved towards  
109 chloramphenicol [22], an aromatic antibiotic (Figure 1C). Specifically, the bulky binding pocket  
110 of CAT<sub>Sa</sub> likely contributes to more interaction with the aromatic substrates than the short, linear-  
111 chain alcohols (Figure S1B and S1C).

112 Overall, thermostable CATs, e.g., CAT<sub>Sa</sub>, can have broad range of substrate specificities  
113 towards linear, short-chain, and aromatic alcohols and hence can be harnessed as AATs for novel  
114 ester biosynthesis at elevated temperature.

### 115 **Discovery of a CAT<sub>Sa</sub> variant improving conversion isobutanol and acetyl CoA into isobutyl** 116 **acetate**

117 Since the *in vivo* activity of CAT<sub>Sa</sub> is more than 50-fold higher for the aromatic alcohols  
118 than isobutanol, we asked whether its activity could be improved for isobutyl acetate biosynthesis.  
119 Using the *in silico* analysis, we started by examining whether any modification of the binding  
120 pocket of CAT<sub>Sa</sub> could improve the activity towards isobutanol. According to the homology model,  
121 the binding pocket consists of Tyr-20, Phe-27, Tyr-50, Thr-88, Ile-89, Phe-90, Phe-97, Ser-140,  
122 Leu-141, Ser-142, Ile-143, Ile-144, Pro-145, Trp-146, Phe-152, Leu-154, Ile-166, Ile-167, Thr-  
123 168, His-189, Asp-193, Gly-194, and Tyr-195, where the His189 and Asp193 are the catalytic sites  
124 (Figure 2A). Since chloramphenicol resistance is likely a strong selective pressure throughout  
125 evolution, we expected all CATs to exhibit a common binding pocket structure. Unsurprisingly,  
126 conserved sequences in the binding pocket were observed by protein sequence alignment of CAT<sub>Sa</sub>  
127 with other CATs of Type A (Figure S2A). Especially, Pro-85 and Phe-97 were highly conserved  
128 in CATs of not only Type-A but also Type-B (Figure 2B and Figure S2B).

129 Based on the binding pocket identified, we performed docking simulation with alanine and  
130 residue scans using the acetyl-CoA-isobutanol-CAT<sub>Sa</sub> complex to identify potential candidates for

131 mutagenesis (Figure S3A and S3B). Remarkably, the top three variant candidates were suggested  
132 at the Phe-97 residue. This residue is involved in the formation of a tunnel-like binding pocket  
133 [22]. Motivated by the analysis, Phe-97 was chosen for site saturated mutagenesis, and the variants  
134 were screened in *E. coli* for isobutyl acetate production by external supply of isobutanol.

135 The result showed that all the F97 variants did not affect protein expression levels in *E.*  
136 *coli* (Figure 2C). Among the variants characterized, the F97W variant exhibited the best  
137 performance (Figure 2D). As compared to the wildtype, the F97W variant enhanced the isobutyl  
138 acetate production by 4-fold. Subsequent *in silico* analysis showed that the mutation created a CH-  
139  $\pi$  interaction between the hydrogen of isobutanol and the indole ring of F97W (Figure 2E). The  
140 model also indicated no change in distance between the isobutanol and active site (His-189) in  
141 F97W. Therefore, the CH- $\pi$  interaction is likely responsible for the improved activity of F97W  
142 variant towards isobutyl acetate biosynthesis.

#### 143 ***In vitro* Characterization of CAT<sub>Sa</sub> F97W**

144 Before deploying CAT<sub>Sa</sub> F97W for isobutyl acetate biosynthesis in the thermophile CBP  
145 organism *C. thermocellum*, we checked whether the F97W mutation affected thermal stability of  
146 the enzyme. We overexpressed and purified both the wildtype CAT<sub>Sa</sub> and CAT<sub>Sa</sub> F97W variant  
147 (Figure 3A). The SDS-PAGE analysis confirmed the expression and purification of the enzymes  
148 by bands with the expected monomer size (25.8 kDa). Thermofluor assay revealed that the F97W  
149 variant slightly lowered the wildtype melting point from 72°C to 68.3°C (Figure 3B). Since CAT<sub>Sa</sub>  
150 F97W maintained high melting point, it is possible that CAT<sub>Sa</sub> F97W still maintains its  
151 functionality at high temperature ( $\geq 50^\circ\text{C}$ ) but needs to be thoroughly characterized.

152 Table 2 shows the *in vitro* enzymatic activities of both the wildtype CAT<sub>Sa</sub> and CAT<sub>Sa</sub>  
153 F97W at 50°C. The turnover number (kcat) of CAT<sub>Sa</sub> F97W was two times higher than that of the

154 wildtype. The increased turnover number of CAT<sub>Sa</sub> F97W led to 1.9-fold increase in enzymatic  
155 efficiency (kcat/K<sub>M</sub>, 4.08 ± 0.62, 1/M/sec) while the mutation did not result in significant change  
156 in K<sub>M</sub>. The improved enzymatic efficiency of CAT<sub>Sa</sub> F97W agrees with the enhanced isobutanol  
157 production observed in the *in vivo* characterization using the CAT<sub>Sa</sub>-overexpressing *E. coli* (Figure  
158 2C).

159         Based on the rigidity of the binding pocket, we originally presumed that mutagenesis on  
160 the binding pocket would result in activity loss towards chloramphenicol. Surprisingly, CAT<sub>Sa</sub>  
161 F97W retained the activity towards chloramphenicol (Table 2). The F97W mutation decreased  
162 kcat but also lowered K<sub>M</sub>, resulting in a compensation effect. Turnover number of CAT<sub>Sa</sub> (kcat,  
163 202.97 ± 3.36, 1/sec) was similar to the previously reported value by Kobayashi *et al.* [12], but K<sub>M</sub>  
164 (0.28 ± 0.02, mM) was about 1.75-fold higher. The difference might attribute to the experimental  
165 condition and analysis performed. Kobayashi *et al.* used chloramphenicol in a range of 0.05-0.2  
166 mM for the assay and the Lineweaver-Burk method for analysis, while we used a 0-1.0 mM range  
167 with a nonlinear regression analysis method. Interestingly, affinity towards acetyl-CoA was  
168 independent of the alcohol co-substrates (Table S2), suggesting that the alcohol affinity would be  
169 likely the main bottleneck for microbial production of isobutyl acetate.

170         Taken altogether, the F97W mutation not only resulted in 1.9-fold higher enzymatic  
171 efficiency towards isobutanol but also retained thermal stability of CAT<sub>Sa</sub>. Thus, CAT<sub>Sa</sub> F97W  
172 variant can serve a starting candidate to demonstrate direct biosynthesis of isobutyl acetate at  
173 elevated temperature by *C. thermocellum*.

174 **Isobutyl acetate production from cellulose at elevated temperature by an engineered *C.***  
175 ***thermocellum* overexpressing CAT<sub>Sa</sub> F97W**



176 We next investigated whether *C. thermocellum* overexpressing CAT<sub>Sa</sub> F97W could  
177 produce isobutyl acetate at elevated temperature. This thermophile was chosen because it has a  
178 high cellulolytic activity suitable for CBP, a one-step process configuration for cellulase  
179 production, cellulose hydrolysis, and fermentation for direct conversion of lignocellulosic biomass  
180 to fuels and chemicals [23]. Furthermore, studies have demonstrated that the wildtype *C.*  
181 *thermocellum* has native metabolism capable of endogenously producing precursor metabolites for  
182 ester biosynthesis, such as acetyl-CoA, isobutyryl-CoA, as well as ethanol [24] and higher alcohols  
183 (e.g., isobutanol) under high cellulose loading fermentation [25-27] (Figure 4A, S5A).

184 We started by generating two isobutyl acetate-producing strains, HSCT0101 and  
185 HSCT0102, by introducing the plasmids pHS0024 (harboring the wildtype CAT<sub>Sa</sub>) and  
186 pHS0024\_F97W (harboring the mutant CAT<sub>Sa</sub> F97W) into *C. thermocellum* DSM1313. Colonies  
187 were isolated on antibiotics selective plates at 55°C. Successful transformation clearly indicated  
188 that CAT<sub>Sa</sub> F97W conferred the thiamphenicol resistance and hence maintained CAT activity. This  
189 result agrees with the *in vitro* enzymatic activity of CAT<sub>Sa</sub> F97W (Table 2).

190 We next evaluated whether the *C. thermocellum* strains could synthesize isobutyl acetate  
191 from cellobiose. Since the endogenous isobutanol production from a typical cellobiose  
192 concentration (5 g/L) is low [27], we supplemented the media with 2 g/L isobutanol. Both  
193 HSCT0101 and HSCT0102 could produce isobutyl acetate at 55°C as expected. Like the *in vivo*  
194 characterization in *E. coli* (Figure 2C), HSCT0102 outperformed HSCT0101 with 3.5-fold  
195 increase in isobutyl acetate production (Figure 4B). Interestingly, we also observed the parent *C.*  
196 *thermocellum* M1354 produced a trace amount of isobutyl acetate (< 0.1 mg/L) even though this  
197 strain does not harbor a CAT (Figure S4). This phenomenon was only observed when hexadecane  
198 overlay was used during fermentation for ester extraction. One possible explanation is the

199 endogenous activity of esterases in *C. thermocellum* might have been responsible for low isobutyl  
200 acetate production while the organic phase overlay helps extract the target ester. It should be noted  
201 that the esterase reaction is reversible and more thermodynamically favorable for ester degradation  
202 than biosynthesis.

203 Finally, we tested whether HSCT0102 could produce isobutyl acetate directly from  
204 cellulose at elevated temperature (55°C) without external supply of isobutanol. After 72 hours, cell  
205 mass, containing 550 mg/L of pellet protein, reached 1.04 g/L, and 17 g/L of cellulose were  
206 consumed (Figure 4C). About 103 mg/L of isobutanol were produced for the first 48 hours, and  
207 further increased up to 110 mg/L for additional 24 hours (Figure 4D). Besides isobutanol, *C.*  
208 *thermocellum* also produced other fermentative metabolites, including ethanol, formate, acetate,  
209 and lactate, as expected (Figure S5A, S5B). For the target isobutyl acetate production, HSCT0102  
210 did not produce isobutyl acetate for the first 24 hours but started accumulating the target product  
211 for the next 48 hours. The observed profile of isobutyl acetate production could be attributed to  
212 the low substrate affinity of CAT<sub>Sa</sub>F97W (Table 2). The final titer of isobutyl acetate reached 1.9  
213 mg/L, achieving about 0.12% (w/w) cellulose conversion.

214 Besides the production of the desirable ester isobutyl acetate, we also observed that  
215 HSCT0102 produced other detectable esters such as ethyl acetate, ethyl isobutyrate, and isobutyl  
216 isobutyrate (Figure S5A, S5C, S5D). Endogenous biosynthesis of these esters could be explained  
217 from the complex redox and fermentative metabolism of *C. thermocellum* [26, 28]. *C.*  
218 *thermocellum* can endogenously synthesize the precursor metabolites, acetyl-CoA and ethanol via  
219 the ethanol biosynthesis pathway while *C. thermocellum* can endogenously produce the precursor  
220 metabolites, isobutyryl-CoA and isobutanol via the valine biosynthesis (Figure S5A). With the  
221 availability of four precursor metabolites, *C. thermocellum* could produce ethyl acetate, ethyl

222 isobutyrate, isobutyl acetate, and isobutyl isobutyrate as observed experimentally (Figure S5A,  
223 S5C, S5D).

224 Taken altogether, *C. thermocellum* overexpressing CAT<sub>Sa</sub> successfully produced the target  
225 isobutyl acetate from cellulose at elevated temperature (55°C). The engineered CAT<sub>Sa</sub> F97W  
226 enhanced isobutyl acetate production and is capable of producing other types of esters.

227

## 228 **Conclusions**

229 This study demonstrated that a CAT can function and/or be re-purposed as an AAT for  
230 novel biosynthesis of designer esters at elevated temperature. Both *in silico* and *in vivo*  
231 characterization discovered a broad alcohol substrate range of the thermostable chloramphenicol  
232 acetyltransferase from *Staphylococcus aureus* (CAT<sub>Sa</sub>). Discovery of the F97W mutation of CAT<sub>Sa</sub>  
233 by model-guided protein engineering enhanced isobutyl acetate production. This study presented  
234 the first report on the consolidated bioprocessing of cellulose into ester(s) by the thermophilic CBP  
235 organism *C. thermocellum* harboring an engineered thermostable CAT<sub>Sa</sub> F97W. Overall, this  
236 research helps establish a foundation for engineering non-model organisms for direct conversion  
237 of lignocellulosic biomass into designer bioesters.

238

## 239 **Materials and methods**

### 240 **Bacterial strains and plasmids**

241 Bacterial strains and plasmids used in this study are listed in Table 1. *Clostridium*  
242 *thermocellum* DSM1313  $\Delta hpt$  (M1354) strain was used as a host for the thermophilic ester  
243 production. It should be noted that the deletion of hypoxanthine phosphoribosyltransferase gene  
244 (*hpt*, Clo1313\_2927) in the wildtype DSM1313 allows genetic engineering by 8-Azahypoxanthine

245 (8-AZH) counter selection; this deletion does not have any known adverse effect on cell growth  
246 and metabolism [29, 30]. The plasmid pNW33N, containing CAT<sub>Sa</sub>, is thermostable and was used  
247 to express various CATs in *C. thermocellum*. The pET plasmids were used for molecular cloning  
248 and enzyme expression in *E. coli*.

#### 249 **Chemicals and reagents**

250 All chemicals were purchased from Sigma-Aldrich (MO, USA) and/or Thermo Fisher  
251 Scientific (MA, USA), unless specified elsewhere. For molecular cloning, restriction enzymes and  
252 T4 ligase were obtained from New England Biolabs (MA, USA). Phusion Hot Start II DNA  
253 polymerase was used for polymerase chain reaction (PCR).

#### 254 **Media and cultivation**

255 For molecular cloning and protein expression, *E. coli* strains were grown in lysogeny broth  
256 (LB) containing appropriate antibiotics unless noted otherwise. For *in vivo* characterization of  
257 CAT<sub>Sa</sub> in *E. coli*, M9 hybrid medium [5] with 20 g/L glucose was used. For *C. thermocellum*  
258 culture, MTC minimal medium or CTFuD-NY medium [30] was used as specified in the  
259 experiments. Optical density (OD) was measured by a spectrophotometer at 600 nm wavelength  
260 (Spectronic 200+, Thermo Fisher Scientific, MA, USA).

#### 261 **Multiple sequence alignment analysis**

262 Multiple sequence alignment (MSA) analysis was performed using MEGA7 [31]. Protein  
263 sequences were aligned by ClustalW [32] and visualized by ESPript 3.0 (<http://esprict.ibcp.fr>)  
264 [33]. The key features in protein structures of 3U9F [34], 4CLA [35], and 2XAT [36] were  
265 extracted from CAT\_SALTI, CAT3\_ECOLIX, and CAT4\_PSEAE, respectively.

#### 266 **Molecular modeling and docking simulations**

267           **Three-dimensional (3D) structures.** The 3D structure of CAT<sub>Sa</sub> and alcohols of interest  
268 were first generated using Swiss-Model [37] and the ‘Builder’ tools of MOE (Molecular Operating  
269 Environment software, version 2019.01), respectively. The 3D structure of the dual substrates-  
270 bounded CAT<sub>Sa</sub> complex (i.e., acetyl-CoA-isobutanol-CAT<sub>Sa</sub>) was obtained by extracting an  
271 isobutanol from the isobutanol-CAT<sub>Sa</sub> complex and then adding it to the acetyl-CoA-CAT<sub>Sa</sub>  
272 complex. All the structures were prepared by the ‘QuickPrep’ tool of MOE with default parameters  
273 and further optimized by energy minimization with the Amber10: EHT force field.

274           **Docking simulation.** To perform docking simulations, the potential binding pocket was  
275 searched using the ‘Site Finder’ tool of MOE. The best-scored site, consistent with the reported  
276 catalytic sites [38], was selected for further studies. Docking simulations were performed as  
277 previously described [39]. Briefly, acetyl-CoA and each alcohol were docked using the induced  
278 fit protocol with the Triangle Matcher placement method and the London  $\Delta G$  scoring function.  
279 After the docking simulations, the best-scored binding pose, showing the crucial interaction  
280 between the residue and the substrate at root-mean-square-deviation (RMSD)  $< 2 \text{ \AA}$ , was selected.  
281 As an example, for the acetyl-CoA docking, the binding pose exhibiting the hydrogen bond  
282 between the hydroxyl of Ser-148 and the N<sup>71</sup> of the CoA was chosen [40]. For the alcohol docking,  
283 the binding pose showing the hydrogen bond between the N<sup>3</sup> of His-189 and the hydroxyl of  
284 alcohol was selected [22].

285           **In silico mutagenesis analysis.** *In silico* mutagenesis analysis of the acetyl-CoA-  
286 isobutanol-CAT<sub>Sa</sub> complex was carried out as previously described [39]. Specifically, the ‘alanine  
287 scan’ and ‘residue scan’ tools of MOE were used to identify the potential residue candidates for  
288 mutagenesis.

289           **Molecular cloning**

290 **Plasmid construction.** Plasmids were constructed by the standard molecular cloning  
291 technique of ligase dependent method and/or Gibson assembly [41] using the primers listed in  
292 Table S1. The constructed plasmids were introduced into *E. coli* TOP10 by heat shock  
293 transformation. Colonies isolated on a selective plate were PCR screened and plasmid purified.  
294 The purified plasmids were verified via Sanger sequencing before being transformed into *E. coli*  
295 BL21 (DE3). Site-directed mutagenesis was performed using the QuickChange™ site-directed  
296 mutagenesis protocol with reduced overlap length [42] or Gibson assembly method [41]. For the  
297 *C. thermocellum* engineering, the plasmid pHS005 was constructed first and then modified to  
298 pHS0024. pHS0024 has no *hpt* at the downstream of the operon while other sequences of the  
299 plasmid are identical to pHS005.

300 **Transformation.** The conventional chemical transformation and electroporation methods  
301 were used for transformation of *E. coli* [43] and *C. thermocellum* [30], respectively. For *C.*  
302 *thermocellum*, the method, however, was slightly modified as described here. First, *C.*  
303 *thermocellum* M1354 (Table 1) was cultured in 50 mL CTFuD-NY medium at 50°C inside an  
304 anaerobic chamber (Bactron300, Sheldon manufacturing Inc., OR, USA). The cell culture with  
305 OD in a range of 0.8-1.0 was cooled down at room temperature for 20 minutes. Beyond this point,  
306 all steps were performed outside the chamber. The cooled cells were harvested at 6,500 x g and  
307 4°C for 20 minutes. The cell pellets were washed twice with ice-chilled Milli-Q water and  
308 resuspended in 200 µL of the transformation buffer consisting of 250 mM sucrose and 10% (v/v)  
309 glycerol. Several 30 µL aliquots of the electrocompetent cells were immediately stored at -80°C  
310 for further use. For electroporation, the electrocompetent cells were thawed on ice and incubated  
311 with 500–1,000 ng of methylated plasmids [44] for 10 minutes. Then, the cells were transferred to  
312 an ice-chilled 1-mm gap electroporation cuvette (BTX Harvard Apparatus, MA, USA) followed

313 by two consecutive exponential decay pulses with 1.8 kV, 350  $\Omega$ , and 25  $\mu$ F. The pulses usually  
314 resulted in a 7.0-8.0 ms time constant. The cells were immediately resuspended in pre-warmed  
315 fresh CTFuD-NY and recovered at 50°C under anaerobic condition (90 % N<sub>2</sub>, 5% H<sub>2</sub>, and 5%  
316 CO<sub>2</sub>) inside a rubber capped Balch tube. After 0-12 hours of recovery, the cells were mixed with  
317 molten CTFuD-NY agar medium supplemented with 15  $\mu$ g/mL thiamphenicol. Finally, the  
318 medium-cell mixture was poured on a petri dish and solidified inside the anaerobic chamber. The  
319 plate was incubated at 50°C up to one week until colonies appeared.

### 320 ***In vivo* characterization of CAT<sub>Sa</sub> and its variants in *E. coli***

321 For *in vivo* characterization of CAT<sub>Sa</sub> and its variants in *E. coli*, high-cell density cultures  
322 were performed as previously described [45] with an addition of 2 g/L of various alcohols. For *in-*  
323 *situ* extraction of esters, each tube was overlaid with 25% (v/v) hexadecane. To confirm the protein  
324 expression of CAT<sub>Sa</sub> and its variants, 1% (v/v) of stock cells were grown overnight at 37°C and  
325 200 rpm in 15 mL culture tubes containing 5 mL of LB media and antibiotics. Then, 4% (v/v) of  
326 the overnight cultures were transferred into 1 mL of LB media containing antibiotics in a 24-well  
327 microplate. The cultures were grown at 37°C and 350 rpm using an incubating microplate shaker  
328 (Fisher Scientific, PA, USA) until OD reached to 0.4~0.6 and then induced by 0.1 mM isopropyl  
329  $\beta$ -D-1-thiogalactopyranoside (IPTG) for 4 hours with a Breathe-Easy Sealing Membrane to  
330 prevent evaporation and cross contamination (cat# 50-550-304, Research Products International  
331 Corp., IL, USA). The protein samples were obtained using the B-PER complete reagent (cat#  
332 89822, Thermo Scientific, MA, USA), according to the manufacturer's instruction and analyzed  
333 by SDS-PAGE.

### 334 **Enzyme characterization**

335           ***His-tag purification.*** For enzyme expression, an overnight culture was inoculated with a  
336 1:50 ratio in fresh LB medium containing 1 mM IPTG and antibiotics, followed by 18°C overnight  
337 incubation (up to 20 hours) in a shaking incubator at 200 rpm. The induced cells were harvested  
338 by centrifugation at 4°C, and 4,700 x g for 10 minutes. The cell pellet was then washed once with  
339 Millipore water and resuspended in the B-PER complete reagent. After 30 min incubation at room  
340 temperature, the mixture was centrifuged at 17,000 x g for 2 minutes. The supernatant was  
341 collected and designated as crude extract. For his-tag purification, the crude extract was incubated  
342 with HisPur Ni-NTA superflow agarose in a batch as the manufacturer recommends. Then, the  
343 resin was washed with at least three volumes of wash buffer, consisting of 50 mM Tris-HCl (pH  
344 8.0), 300 mM NaCl, 10 mM imidazole, and 0.1 mM EDTA. The resin bound proteins were eluted  
345 by 300 µL elution buffer containing 50 mM Tris-HCl (pH 8.0), 50 mM NaCl, 300 mM imidazole,  
346 and 0.1 mM EDTA. The eluted sample was then desalted and concentrated via an Amicon filter  
347 column with 10 kDa molecular weight cutoff. Finally, the protein sample was suspended in 200  
348 µL of 20 mM Tris-HCl buffer (pH 8.0). Protein concentration was measured by the Bradford assay  
349 [46] with bovine serum albumin (BSA) as the reference protein.

350           ***Thermal shift assay.*** To measure protein melting point ( $T_m$ ), a thermofluor assay was  
351 employed with SYPRO Orange [47]. About 10 to 250 µg of His-tag purified protein was mixed  
352 with 5x SYPRO Orange in a 50 µL final volume in a 96-well qPCR plate. The plate was sealed  
353 with PCR caps before running the assay. The StepOne real-time PCR machine (Applied  
354 Biosystems, CA, USA) was used to run the assay with the following parameters: ROX reporter,  
355 1°C increment per cycle, one-minute hold at every cycle, and temperature range from 20°C to  
356 98°C. The data was collected, exported, and processed to calculate  $T_m$ .



357 **5,5'-dithiobis-(2-nitrobenzoic acid) (DTNB) assay.** Reaction rate for each CAT was  
358 determined by a DTNB assay [48] in a 384-well plate. Total reaction volume was 50  $\mu$ L with the  
359 reaction buffer comprising of 50 mM Tris-HCl (pH 8.0). Concentrations of acetyl-CoA (CoALA  
360 Biosciences, TX, USA) and alcohols were varied as specified in each experiment. Final enzyme  
361 concentrations of 0.05  $\mu$ g/mL and 10  $\mu$ g/mL were used for the reactions towards chloramphenicol  
362 and alcohols, respectively. Reaction kinetics were collected by measuring absorbance at 412 nm  
363 every minute for one hour at 50°C in a microplate reader (Synergy HTX microplate reader,  
364 BioTek). The reaction rate was calculated using the extinction coefficient from a standard curve  
365 of free coenzyme A (MP Biomedicals, OH, USA) under the same condition. It should be noted  
366 that since the maximum operating temperature recommended for the plate reader is 50°C, the high  
367 throughput enzyme assay for CAT at elevated temperature was only performed to determine  
368 enzyme kinetics parameters.

369 **Calculation of kinetic parameters for reaction rates.** The parameters of Michaelis-Menten  
370 rate law (eqn. 1) were calculated for each enzyme as follows. First, linear regression was performed  
371 on data collected from a microplate reader to identify initial reaction rates,  $y_i$ , at different initial  
372 substrate concentrations,  $s_i$ , where  $i = \{1, 2, \dots, n\}$  is the number of data points collected. Then, these  
373 initial reaction rates and associated initial substrate concentrations for all replicates were  
374 simultaneously fit to the Michaelis-Menten model (eqn. 1) using robust non-linear regression (eqn.  
375 2) with a soft-L1-loss estimator (eqn. 3) as implemented in the SciPy numerical computing library  
376 v1.2.0 [49, 50].

377 
$$v_i = \frac{v_{max}s_i}{K_M + s_i} \quad [1]$$

378 
$$\min_{k_m, v_{max}} \sum_{i=1}^n \rho((v_i(s_i, K_M, v_{max}) - y_i)^2) \quad [2]$$

379 
$$\rho(z) = 2(\sqrt{1 + z}) - 1 \quad [3]$$

380 The least squares problem determines the parameters  $K_M$  and  $v_{max}$  by minimizing the difference  
381 between the model predicted reaction rates  $v_i$  and measured reaction rates  $y_i$  (eqn. 2). A  
382 smoothing function  $\rho(z)$  is used to make the least square problem resistant to outliers (eqn. 3).  
383 Due to the unbiased resistance to outliers and the avoidance of errors resulting from conventional  
384 linearization methods, robust non-linear regression provides the most precise parameter estimate  
385 for the Michaelis-Menten model [51].

### 386 **Isobutyl acetate production in *C. thermocellum***

387 ***Cellobiose fermentation.*** Isobutyl acetate production from cellobiose in *C. thermocellum*  
388 strains was performed by the two-step bioconversion configuration. Cells were first cultured in  
389 MTC minimal medium [30] containing 5 g/L cellobiose in a rubber capped Balch tube until OD  
390 reached 0.8~1.0. The cells were cooled down at room temperature for 20 minutes and centrifuged  
391 at 4,700 x g and 4°C for 20 minutes. After removing the supernatant, cells were resuspended in the  
392 same volume of fresh MTC minimal media containing 2 g/L isobutanol in an anaerobic chamber.  
393 The cell suspension was then divided into 800  $\mu$ L in a 2.0 mL screw cap microcentrifuge tube with  
394 a 200  $\mu$ L hexadecane overlay. The cells were incubated at 55°C for 24 hours followed by analysis  
395 of gas chromatography coupled with a mass spectrometer (GC/MS) to quantify the amount of  
396 isobutyl acetate produced.

397 ***Cellulose fermentation.*** For the cellulose fermentation, modified MTC medium (C-MTC  
398 medium) was used. 20 g/L of Avicel PH-101 was used as a sole carbon source instead of  
399 cellobiose, and 10 g/L of MOPS was added to increase buffer capacity. Initial pH was adjusted to  
400 7.5 by 5M KOH and autoclaved. In an anaerobic chamber, 0.8 mL of overnight cell culture was  
401 inoculated in 15.2 mL of C-MTC medium (1:20 inoculation ratio) with 4 mL of overlaid  
402 hexadecane. Each tube contained a small magnetic stirrer bar to homogenize cellulose. The rubber

403 capped Balch tube was incubated in a water bath connected with a temperature controller set at  
404 55°C and a magnetic stirring system. Following pH adjustment with 70  $\mu$ L of 5 M KOH injection,  
405 800  $\mu$ L of cell culture and 200  $\mu$ L of hexadecane layer were sampled every 12 hours. Culture pH  
406 was maintained within a range of 6.4-7.8 during the fermentation.

407 Cell growth was monitored by measuring pellet protein. The cell-cellulose pellet from 800  
408  $\mu$ L sampling volumes was washed twice with Milli-Q water and suspended by 200  $\mu$ L lysis buffer  
409 (0.2 M NaOH, 1% SDS) followed by an hour incubation at room temperature. Then, the solution  
410 was neutralized with 50  $\mu$ L 0.8 M HCl and diluted by 550  $\mu$ L water. The mixture was centrifuged  
411 at 17,000 x g for 3 minutes. Protein concentration from the supernatant was analyzed by the  
412 detergent-compatible Bradford assay (Thermo Scientific, WA, USA). The residual pellet was  
413 boiled in a 98°C oven for an hour before quantifying residual cellulose.

414 Residual cellulose was quantified by the phenol-sulfuric acid method [52] with some  
415 modifications. The boiled sample was washed twice with Milli-Q water and suspended in 800  $\mu$ L  
416 water to make equivalent volume to the original. The sample was homogenized by pipetting and  
417 vortexing for 10 seconds, and 20  $\mu$ L of the homogenized sample was transferred to a new 2.0 mL  
418 microcentrifuge tube or 96-well plate and dried overnight in a 55°C oven. The dried pellet was  
419 suspended in 200  $\mu$ L of 95% sulfuric acid and incubated for an hour at room temperature. After  
420 the pellet was dissolved completely, 20  $\mu$ L of 5% phenol was added and mixed with the sulfuric  
421 acid solution. After 30 min incubation at room temperature, 100  $\mu$ L of the sample was transferred  
422 to a new 96-well plate, and the absorbance at 490 nm was measured. The absorbance was converted  
423 to cellulose concentration by the standard curve of Avicel PH-101 treated by the same procedure.

424 **Analytical methods**

425 **High-performance liquid chromatography (HPLC).** Extracellular metabolites were  
426 quantified by using a high-performance liquid chromatography (HPLC) system (Shimadzu Inc.,  
427 MD, USA). 800  $\mu$ L of culture samples was centrifuged at 17,000 x g for 3 minutes, then the  
428 supernatants were filtered through 0.2 micron filters and run with 10 mN H<sub>2</sub>SO<sub>4</sub> mobile phase at  
429 0.6 mL/min on an Aminex HPX-87H (Biorad Inc., CA, USA) column at 50°C. Refractive index  
430 detector (RID) and ultra-violet detector (UVD) at 220 nm were used to monitor concentrations of  
431 sugars, organic acids, and alcohols.

432 **Gas chromatography coupled with mass spectroscopy (GC/MS).** Esters were measured  
433 by GC (HP 6890, Agilent, CA, USA) equipped with a MS (HP 5973, Agilent, CA, USA). For the  
434 GC system, the Zebron ZB-5 (Phenomenex, CA, USA) capillary column (30 m x 0.25 mm x 0.25  
435  $\mu$ m) was used to separate analytes, and helium was used as the carrier with a flow rate of 0.5  
436 mL/min. The oven temperature program was set as follows: 50°C initial temperature, 1°C/min  
437 ramp up to 58°C, 25°C/min ramp up to 235°C, 50°C/min ramp up to 300°C, and 2-minutes bake-  
438 out at 300°C. 1  $\mu$ L of sampled hexadecane layer was injected into the column in the splitless mode  
439 with an injector temperature of 280°C. For the MS system, selected ion mode (SIM) was used to  
440 detect and quantify esters with the following parameters: (i) ethyl acetate, m/z 45.00 and 61.00  
441 from 4.2 to 4.6 minute retention time (RT), (ii) isopropyl acetate, m/z 45 and 102 from 4.7 to 5.0  
442 minute RT, (iii) propyl acetate, m/z 59 and 73 from 5.2 to 5.8 minute RT, (iv) ethyl isobutyrate,  
443 m/z 73 and 116 from 6.1 to 6.6 minute RT, (v) isobutyl acetate, m/z 61 and 101 from 6.6 to 7.6  
444 minute RT, (vi) butyl acetate, m/z 61 and 116 from 7.7 to 9.2 minute RT, (vii) isobutyl isobutyrate,  
445 m/z 89 and 129 from 10.1 to 12.5 minute RT, (viii) benzyl acetate, m/z 108 and 150 from 13.1 to  
446 13.8 minute RT, and (ix) 2-phenethyl acetate, m/z 104 and 121 from 13.8 to 15.5 minute RT.  
447 Isoamyl alcohol and isoamyl acetate were used as the internal standard analytes. The esters were

448 identified by RT and quantified by the peak areas and standard curves. Standard curves were  
449 determined by using pure esters diluted into hexadecane at concentrations of 0.01 g/L, 0.05 g/L,  
450 0.1 g/L, 0.5 g/L, and 1 g/L.

451

## 452 **ABBREVIATIONS**

453 **AAT**: alcohol acetyltransferase, **CBP**: consolidated bioprocessing, **CAT**: chloramphenicol  
454 acetyltransferase, **PCR**: polymerase chain reactions, **MSA**: multiple sequence alignment, **DCW**:  
455 dried cell weight, **DTNB**: 5,5'-dithiobis-(2-nitrobenzoic acid), **GC**: gas chromatography, **HPLC**:  
456 high-performance liquid chromatography, **IPTG**: isopropyl  $\beta$ -D-1-thiogalactopyranoside, **kDa**:  
457 kilo Dalton, **MOE**: Molecular Operating Environment software, **MS**: mass spectrometry, **OD**:  
458 optical density, **RMSD**: root-mean-square-deviation, **RT**: retention time, **SDS-PAGE**: sodium  
459 dodecylsulfate polyacrylamide gel electrophoresis, **8-AZH**: 8-Azahypoxanthine, **Tm**: melting  
460 point.

461

## 462 **AUTHOR'S CONTRIBUTIONS**

463 CTT initiated and supervised the project. HS, JW and CTT designed the experiments, analyzed  
464 the data, and drafted the manuscript. HS and JW performed the experiments. SG calculated  
465 enzyme kinetic parameters and edited the manuscript. All authors read and approved the final  
466 manuscript.

467

## 468 **ACKNOWLEDGMENTS**

469 The authors would like to thank the Center of Environmental Biotechnology at UTK for using the  
470 GC/MS instrument. We would also like to acknowledge the gene synthesis from The Joint Genome  
471 Institute.

472

#### 473 **COMPETING INTERESTS**

474 The authors declare that they have no competing interests.

475

#### 476 **AVAILABILITY OF SUPPORTING DATA**

477 One additional file contains supporting data.

478

#### 479 **CONSENT FOR PUBLICATION**

480 All the authors consent for publication.

481

#### 482 **ETHICAL APPROVAL AND CONSENT TO PARTICIPATE**

483 Not applicable.

484

#### 485 **FUNDING**

486 This research was financially supported in part by the NSF CAREER award (NSF#1553250) and  
487 the Center for Bioenergy Innovation (CBI), the U.S. Department of Energy (DOE) Bioenergy  
488 Research Centers funded by the Office of Biological and Environmental Research in the DOE  
489 Office of Science. The work conducted by the U.S. Department of Energy Joint Genome Institute,  
490 a DOE Office of Science User Facility, is supported by the Office of Science of the U.S.  
491 Department of Energy under Contract No. DE-AC02-05CH11231.

## 492 REFERENCES

- 493 1. Lange JP, Price R, Ayoub PM, Louis J, Petrus L, Clarke L, Gosselink H: **Valeric biofuels:**  
494 **a platform of cellulosic transportation fuels.** *Angew Chem Int Ed Engl* 2010,  
495 **49(26):4479-4483.**
- 496 2. Layton DS, Trinh CT: **Engineering modular ester fermentative pathways in**  
497 ***Escherichia coli*.** *Metab Eng* 2014, **26:77-88.**
- 498 3. Layton DS, Trinh CT: **Microbial synthesis of a branched-chain ester platform from**  
499 **organic waste carboxylates.** *Metab Eng Commun* 2016, **3:245-251.**
- 500 4. Layton DS, Trinh CT: **Expanding the modular ester fermentative pathways for**  
501 **combinatorial biosynthesis of esters from volatile organic acids.** *Biotechnol Bioeng*  
502 2016, **113(8):1764-1776.**
- 503 5. Park YC, Shaffer CEH, Bennett GN: **Microbial formation of esters.** *Appl Microbiol Biot*  
504 2009, **85(1):13-25.**
- 505 6. Tai YS, Xiong M, Zhang K: **Engineered biosynthesis of medium-chain esters in**  
506 ***Escherichia coli*.** *Metab Eng* 2015, **27:20-28.**
- 507 7. Rodriguez GM, Tashiro Y, Atsumi S: **Expanding ester biosynthesis in *Escherichia coli*.**  
508 *Nat Chem Biol* 2014, **10(4):259-265.**
- 509 8. Wilbanks B, Trinh CT: **Comprehensive characterization of toxicity of fermentative**  
510 **metabolites on microbial growth.** *Biotechnology for Biofuels* 2017, **10(1):262.**
- 511 9. Urit T, Li M, Bley T, Loser C: **Growth of *Kluyveromyces marxianus* and formation of**  
512 **ethyl acetate depending on temperature.** *Appl Microbiol Biotechnol* 2013,  
513 **97(24):10359-10371.**
- 514 10. Shaw WV: **Bacterial resistance to chloramphenicol.** *Br Med Bull* 1984, **40(1):36-41.**

- 515 11. Taylor MP, Esteban CD, Leak DJ: **Development of a versatile shuttle vector for gene**  
516 **expression in *Geobacillus* spp.** *Plasmid* 2008, **60**(1):45-52.
- 517 12. Kobayashi J, Furukawa M, Ohshiro T, Suzuki H: **Thermoadaptation-directed evolution**  
518 **of chloramphenicol acetyltransferase in an error-prone thermophile using improved**  
519 **procedures.** *Appl Microbiol Biotechnol* 2015, **99**(13):5563-5572.
- 520 13. Groom J, Chung D, Olson DG, Lynd LR, Guss AM, Westpheling J: **Promiscuous plasmid**  
521 **replication in thermophiles: Use of a novel hyperthermophilic replicon for genetic**  
522 **manipulation of *Clostridium thermocellum* at its optimum growth temperature.** *Metab*  
523 *Eng Commun* 2016, **3**:30-38.
- 524 14. Mohr G, Hong W, Zhang J, Cui GZ, Yang YF, Cui Q, Liu YJ, Lambowitz AM: **A**  
525 **Targetron System for Gene Targeting in Thermophiles and Its Application in**  
526 ***Clostridium thermocellum*.** *Plos One* 2013, **8**(7).
- 527 15. Kannuchamy S, Mukund N, Saleena LM: **Genetic engineering of *Clostridium***  
528 ***thermocellum* DSM1313 for enhanced ethanol production.** *BMC Biotechnol* 2016, **16**  
529 **Suppl 1**:34.
- 530 16. De Rossi E, Brigidi P, Welker NE, Riccardi G, Matteuzzi D: **New shuttle vector for**  
531 **cloning in *Bacillus stearothermophilus*.** *Res Microbiol* 1994, **145**(8):579-583.
- 532 17. Rhee MS, Kim JW, Qian Y, Ingram LO, Shanmugam KT: **Development of plasmid**  
533 **vector and electroporation condition for gene transfer in sporogenic lactic acid**  
534 **bacterium, *Bacillus coagulans*.** *Plasmid* 2007, **58**(1):13-22.
- 535 18. Pillai KMS: **Exploring Biosynthetic Pathways for Aromatic Ester Production.** *Master*  
536 *of Science*. ARIZONA STATE UNIVERSITY; 2016.



- 537 19. Zada B, Wang C, Park JB, Jeong SH, Park JE, Singh HB, Kim SW: **Metabolic engineering**  
538 **of *Escherichia coli* for production of mixed isoprenoid alcohols and their derivatives.**  
539 *Biotechnol Biofuels* 2018, **11**:210.
- 540 20. Alonso-Gutierrez J, Chan R, Batth TS, Adams PD, Keasling JD, Petzold CJ, Lee TS:  
541 **Metabolic engineering of *Escherichia coli* for limonene and perillyl alcohol**  
542 **production.** *Metab Eng* 2013, **19**:33-41.
- 543 21. Jang HJ, Ha BK, Zhou J, Ahn J, Yoon SH, Kim SW: **Selective retinol production by**  
544 **modulating the composition of retinoids from metabolically engineered *E. coli*.**  
545 *Biotechnol Bioeng* 2015, **112**(8):1604-1612.
- 546 22. Leslie AG, Moody PC, Shaw WV: **Structure of chloramphenicol acetyltransferase at**  
547 **1.75-Å resolution.** *Proc Natl Acad Sci U S A* 1988, **85**(12):4133-4137.
- 548 23. Lynd LR, van Zyl WH, McBride JE, Laser M: **Consolidated bioprocessing of cellulosic**  
549 **biomass: an update.** *Curr Opin Biotechnol* 2005, **16**(5):577-583.
- 550 24. Tian L, Papanek B, Olson DG, Rydzak T, Holwerda EK, Zheng T, Zhou J, Maloney M,  
551 Jiang N, Giannone RJ *et al*: **Simultaneous achievement of high ethanol yield and titer**  
552 **in *Clostridium thermocellum*.** *Biotechnol Biofuels* 2016, **9**:116.
- 553 25. Lin PP, Mi L, Morioka AH, Yoshino KM, Konishi S, Xu SC, Papanek BA, Riley LA, Guss  
554 AM, Liao JC: **Consolidated bioprocessing of cellulose to isobutanol using *Clostridium***  
555 ***thermocellum*.** *Metab Eng* 2015, **31**:44-52.
- 556 26. Thompson RA, Trinh CT: **Overflow metabolism and growth cessation in *Clostridium***  
557 ***thermocellum* DSM1313 during high cellulose loading fermentations.** *Biotechnol*  
558 *Bioeng* 2017, **114**(11):2592-2604.

- 559 27. Holwerda EK, Thorne PG, Olson DG, Amador-Noguez D, Engle NL, Tschaplinski TJ, van  
560 Dijken JP, Lynd LR: **The exometabolome of *Clostridium thermocellum* reveals overflow**  
561 **metabolism at high cellulose loading.** *Biotechnol Biofuels* 2014, **7**(1):155.
- 562 28. Thompson RA, Layton DS, Guss AM, Olson DG, Lynd LR, Trinh CT: **Elucidating**  
563 **central metabolic redox obstacles hindering ethanol production in *Clostridium***  
564 ***thermocellum*.** *Metabolic Engineering* 2015, **32**:207-219.
- 565 29. Argyros DA, Tripathi SA, Barrett TF, Rogers SR, Feinberg LF, Olson DG, Foden JM,  
566 Miller BB, Lynd LR, Hogsett DA *et al*: **High ethanol titers from cellulose by using**  
567 **metabolically engineered thermophilic, anaerobic microbes.** *Appl Environ Microbiol*  
568 2011, **77**(23):8288-8294.
- 569 30. Olson DG, Lynd LR: **Transformation of *Clostridium thermocellum* by electroporation.**  
570 *Methods Enzymol* 2012, **510**:317-330.
- 571 31. Kumar S, Stecher G, Tamura K: **MEGA7: Molecular Evolutionary Genetics Analysis**  
572 **Version 7.0 for Bigger Datasets.** *Mol Biol Evol* 2016, **33**(7):1870-1874.
- 573 32. Chenna R, Sugawara H, Koike T, Lopez R, Gibson TJ, Higgins DG, Thompson JD:  
574 **Multiple sequence alignment with the Clustal series of programs.** *Nucleic Acids Res*  
575 2003, **31**(13):3497-3500.
- 576 33. Robert X, Gouet P: **Deciphering key features in protein structures with the new**  
577 **ENDscript server.** *Nucleic Acids Res* 2014, **42**(Web Server issue):W320-324.
- 578 34. Biswas T, Houghton JL, Garneau-Tsodikova S, Tsodikov OV: **The structural basis for**  
579 **substrate versatility of chloramphenicol acetyltransferase CATI.** *Protein Sci* 2012,  
580 **21**(4):520-530.

- 581 35. Leslie AG: **Refined crystal structure of type III chloramphenicol acetyltransferase at**  
582 **1.75 Å resolution.** *J Mol Biol* 1990, **213**(1):167-186.
- 583 36. Beaman TW, Sugantino M, Roderick SL: **Structure of the hexapeptide xenobiotic**  
584 **acetyltransferase from *Pseudomonas aeruginosa*.** *Biochemistry* 1998, **37**(19):6689-  
585 6696.
- 586 37. Bordoli L, Kiefer F, Arnold K, Benkert P, Battey J, Schwede T: **Protein structure**  
587 **homology modeling using SWISS-MODEL workspace.** *Nat Protoc* 2009, **4**(1):1-13.
- 588 38. Day PJ, Shaw WV, Gibbs MR, Leslie AG: **Acetyl coenzyme A binding by**  
589 **chloramphenicol acetyltransferase: long-range electrostatic determinants of**  
590 **coenzyme A recognition.** *Biochemistry* 1992, **31**(17):4198-4205.
- 591 39. Lee JW, Niraula NP, Trinh CT: **Harnessing a P450 fatty acid decarboxylase from**  
592 ***Macrococcus caseolyticus* for microbial biosynthesis of odd chain terminal alkenes.**  
593 *Metab Eng Commun* 2018, **7**:e00076.
- 594 40. Lewendon A, Murray IA, Shaw WV, Gibbs MR, Leslie AG: **Evidence for transition-state**  
595 **stabilization by serine-148 in the catalytic mechanism of chloramphenicol**  
596 **acetyltransferase.** *Biochemistry* 1990, **29**(8):2075-2080.
- 597 41. Gibson DG: **Enzymatic assembly of overlapping DNA fragments.** *Methods Enzymol*  
598 2011, **498**:349-361.
- 599 42. Zheng L, Baumann U, Reymond JL: **An efficient one-step site-directed and site-**  
600 **saturation mutagenesis protocol.** *Nucleic Acids Res* 2004, **32**(14):e115.
- 601 43. Green. MR, Sambrook J: **Molecular Cloning.** In: *A Laboratory Manual.* Cold Spring  
602 Harbor Laboratory Press, United States; 2001.

- 603 44. Guss AM, Olson DG, Caiazza NC, Lynd LR: **Dcm methylation is detrimental to plasmid**  
604 **transformation in *Clostridium thermocellum***. *Biotechnol Biofuels* 2012, **5**(1):30.
- 605 45. Lee J-W, Trinh CT: **De novo Microbial Biosynthesis of a Lactate Ester Platform**  
606 *bioRxiv doi: 101101/498576* 2018.
- 607 46. Bradford MM: **A rapid and sensitive method for the quantitation of microgram**  
608 **quantities of protein utilizing the principle of protein-dye binding**. *Anal Biochem* 1976,  
609 **72**:248-254.
- 610 47. Lo MC, Aulabaugh A, Jin G, Cowling R, Bard J, Malamas M, Ellestad G: **Evaluation of**  
611 **fluorescence-based thermal shift assays for hit identification in drug discovery**. *Anal*  
612 *Biochem* 2004, **332**(1):153-159.
- 613 48. Ellman GL: **Tissue sulfhydryl groups**. *Arch Biochem Biophys* 1959, **82**(1):70-77.
- 614 49. Eric Jones TO, Pearu Peterson, and Others: **SciPy: Open source scientific tools for**  
615 **Python**. 2019,  
616 [https://docs.scipy.org/doc/scipy/reference/generated/scipy.optimize.curve\\_fit.html](https://docs.scipy.org/doc/scipy/reference/generated/scipy.optimize.curve_fit.html).
- 617 50. Mayorov N: **Robust non linear regression in SciPy**. 2019, [https://scipy-](https://scipy-cookbook.readthedocs.io/items/robust_regression.html)  
618 [cookbook.readthedocs.io/items/robust\\_regression.html](https://scipy-cookbook.readthedocs.io/items/robust_regression.html).
- 619 51. Marasovic M, Marasovic T, Milos M: **Robust Nonlinear Regression in Enzyme Kinetic**  
620 **Parameters Estimation**. *J Chem-Ny* 2017.
- 621 52. Dubois M, Gilles K, Hamilton JK, Rebers PA, Smith F: **A colorimetric method for the**  
622 **determination of sugars**. *Nature* 1951, **168**(4265):167.
- 623  
624  
625

626 **Figure legends**

627 **Figure 1.** Broad substrate specificity of CAT<sub>Sa</sub>. **(A)** Acetylation of chloramphenicol and alcohol  
628 by a chloramphenicol acetyltransferase (CAT) and an alcohol acetyltransferase (AAT),  
629 respectively. **(B)** Comparison between the predicted binding free energies for various alcohols  
630 bound to the binding pocket of CAT<sub>Sa</sub> and the titer of esters produced by the CAT<sub>Sa</sub>-overexpressing  
631 *E. coli* with external supply of alcohols. **(C)** Structure of the CAT<sub>Sa</sub> homology model. The red  
632 arrows indicate the binding pockets formulated by the trimeric structure of CAT<sub>Sa</sub>.

633 **Figure 2.** Discovery of CAT<sub>Sa</sub> F97W responsible for enhanced activity towards isobutanol. **(A)** A  
634 binding pocket of CAT<sub>Sa</sub> and associated amino acid residues. The catalytic site residues are in  
635 purple. **(B)** Protein sequence alignment of CAT<sub>Sa</sub> with different CATs. **(C)** SDS-PAGE analysis  
636 of soluble fractions of CAT<sub>Sa</sub> F97 variants. The soluble fractions of overexpressed CAT<sub>Sa</sub> F97  
637 variants are shown in the red box. **(D)** Screening of F97 site-saturated mutagenized variants for  
638 enhanced isobutyl acetate production in *E. coli*. The letters indicate amino acids substituting F in  
639 the wildtype CAT<sub>Sa</sub>. **(E)** Superposed binding pocket structure of the wildtype and CAT<sub>Sa</sub> F97W  
640 mutant. The red arrow indicates a CH- $\pi$  interaction between the hydrogen of isobutanol and the  
641 indole ring of F97W.

642 **Figure 3.** *In vitro* characterization of the wildtype CAT<sub>Sa</sub> and CAT<sub>Sa</sub> F97W mutant. **(A)** SDS-  
643 PAGE of the purified CAT<sub>Sa</sub> and CAT<sub>Sa</sub> F97W. The black arrow indicates the expected size of  
644 expressed target proteins, including CAT<sub>Sa</sub> and CAT<sub>Sa</sub> F97W. Notations: column 1, crude cell  
645 extract of IPTG induced *E. coli* BL21(DE3) harboring pET\_CAT<sub>Sa</sub>; column 2, His-tag purified  
646 CAT<sub>Sa</sub>; column 3, crude extract of IPTG induced *E. coli* BL21(DE3) harboring pET\_ CAT<sub>Sa</sub>  
647 F97W; column 4, His-tag purified CAT<sub>Sa</sub> F97W; and M, protein ladder. **(B)** Melting curve of

648 CAT<sub>Sa</sub> and CAT<sub>Sa</sub> F97W. The intensity was normalized by each maximum value. (C) Michaelis-  
649 Menten plots of CAT<sub>Sa</sub> and CAT<sub>Sa</sub> F97W for various isobutanol concentrations at 50°C. The co-  
650 substrate, acetyl-CoA, was supplemented at the saturated concentration of 2 mM. The error bars  
651 represent standard deviation of three biological replicates.

652 **Figure 4.** Isobutyl acetate production in the engineered *C. thermocellum*. (A) A simplified isobutyl  
653 acetate production pathway from cellulose in *C. thermocellum*. (B) Biosynthesis of isobutyl acetate  
654 of the wildtype and engineered *C. thermocellum* strains at 55°C from cellobiose with external  
655 supply of 2 g/L of isobutanol. Isobutyl acetate was measured after 24 hours from the hexadecane  
656 layer of cell cultures. Initial OD of each cell culture was in a range of 0.8–1.0. The error bars  
657 represent standard deviation of five biological replicates. Statistical analysis: t-test, “\*” p value <  
658  $4 \times 10^{-4}$ ,  $t = -6.475$ ,  $df = 7$ . (C) Kinetic profiles of cell growth and residual cellulose of HSCT0102.  
659 The error bars represent standard deviation of three biological replicates. (D) Kinetic profiles of  
660 isobutanol and isobutyl acetate production. The error bars represent standard deviation of three  
661 biological replicates. Abbreviation: KOR, 2-ketoisovalerate ferredoxin oxidoreductase; ADH,  
662 alcohol dehydrogenase.

663 **Table 1.** Plasmids and strains used in this study. The plasmids containing mutagenized genes are  
 664 presented in Table S1.

| Name                       | Descriptions                                                                                                                                                                                                                                                        | Source                        |
|----------------------------|---------------------------------------------------------------------------------------------------------------------------------------------------------------------------------------------------------------------------------------------------------------------|-------------------------------|
| <i>Plasmids</i>            |                                                                                                                                                                                                                                                                     |                               |
| pNW33N                     | <i>Bacillus-E. coli</i> shuttle vector, Cm <sup>R</sup> , pBC1 ori for gram positive strains, pBR322 ori for <i>E. coli</i> , source of CAT <sub>Sa</sub>                                                                                                           | Bacillus Genetic Stock Center |
| pETDuet-1                  | pBR322 ori, Amp <sup>R</sup> , lacI, T7lac promoter                                                                                                                                                                                                                 | Novagen                       |
| pET_CAT <sub>Sa</sub>      | CAT <sub>Sa</sub> wild type encoding gene between BamHI, SacI site, pETDuet-1 backbone, 6X His-tag at N-terminus                                                                                                                                                    | This study                    |
| pET_CAT <sub>Sa</sub> F97W | F97W site directed variant, pET_CAT <sub>Sa</sub> backbone                                                                                                                                                                                                          | This study                    |
| pHS0024                    | CAT <sub>Sa</sub> wild type gene under <i>C. thermocellum</i> PgapDH promoter, downstream of Clo1313_2927 for the transcription terminator, tdk operon under cbp promoter substituting with the native cat selection marker, pNW33N plasmid backbone                | This study                    |
| pHS0024_F97W               | CAT <sub>Sa</sub> F97W site-directed mutated from pHS0024                                                                                                                                                                                                           | This study                    |
| <i>Strains</i>             |                                                                                                                                                                                                                                                                     |                               |
| <i>E. coli</i> Top10       | Host for molecular cloning, <i>mcrA</i> , $\Delta(mrr-hsdRMS-mcrBC)$ , <i>Phi80lacZ(del)M15</i> , $\Delta lacX74$ , <i>deoR</i> , <i>recA1</i> , <i>araD139</i> , $\Delta(ara-leu)7697$ , <i>galU</i> , <i>galK</i> , <i>rpsL(SmR)</i> , <i>endA1</i> , <i>nupG</i> | Invitrogen                    |
| <i>E. coli</i> BL21 (DE3)  | <i>E. coli</i> B <i>dcm</i> , <i>ompT</i> , <i>hsdS(rB-mB-)</i> , <i>gal</i>                                                                                                                                                                                        | Invitrogen                    |
| M1354                      | <i>C. thermocellum</i> DSM1313 $\Delta hpt$                                                                                                                                                                                                                         | [29]                          |
| HSCT0101                   | M1354 harboring pHS0024                                                                                                                                                                                                                                             | This study                    |
| HSCT0102                   | M1354 harboring pHS0024_F97W                                                                                                                                                                                                                                        | This study                    |

665

666 **Table 2.** Kinetic parameters of the wildtype CAT<sub>Sa</sub> and mutant CAT<sub>Sa</sub> F97W. The reactions were  
667 performed at 50°C. The co-substrate, acetyl-CoA, was supplied at the saturated concentration of 2  
668 mM. T<sub>m</sub> of CAT<sub>Sa</sub> and CAT<sub>Sa</sub> F97W are 72.0 ± 0.8, and 68.3 ± 1.2 °C, respectively.

669

| Substrates                    | CAT <sub>Sa</sub>             |                | CAT <sub>Sa</sub> F97W        |                |
|-------------------------------|-------------------------------|----------------|-------------------------------|----------------|
|                               | Chloramphenicol               | Isobutanol     | Chloramphenicol               | Isobutanol     |
| K <sub>M</sub> (mM)           | 0.28 ± 0.02                   | 138.66 ± 28.92 | 0.18 ± 0.01                   | 144.77 ± 23.65 |
| kcat (1/sec)                  | 202.97 ± 3.36                 | 0.30 ± 0.03    | 102.63 ± 2.04                 | 0.59 ± 0.05    |
| kcat/K <sub>M</sub> (1/M/sec) | 7.37 ± 0.48 x 10 <sup>5</sup> | 2.16 ± 0.45    | 5.77 ± 0.49 x 10 <sup>5</sup> | 4.08 ± 0.62    |

670



671 **Figure 1.**

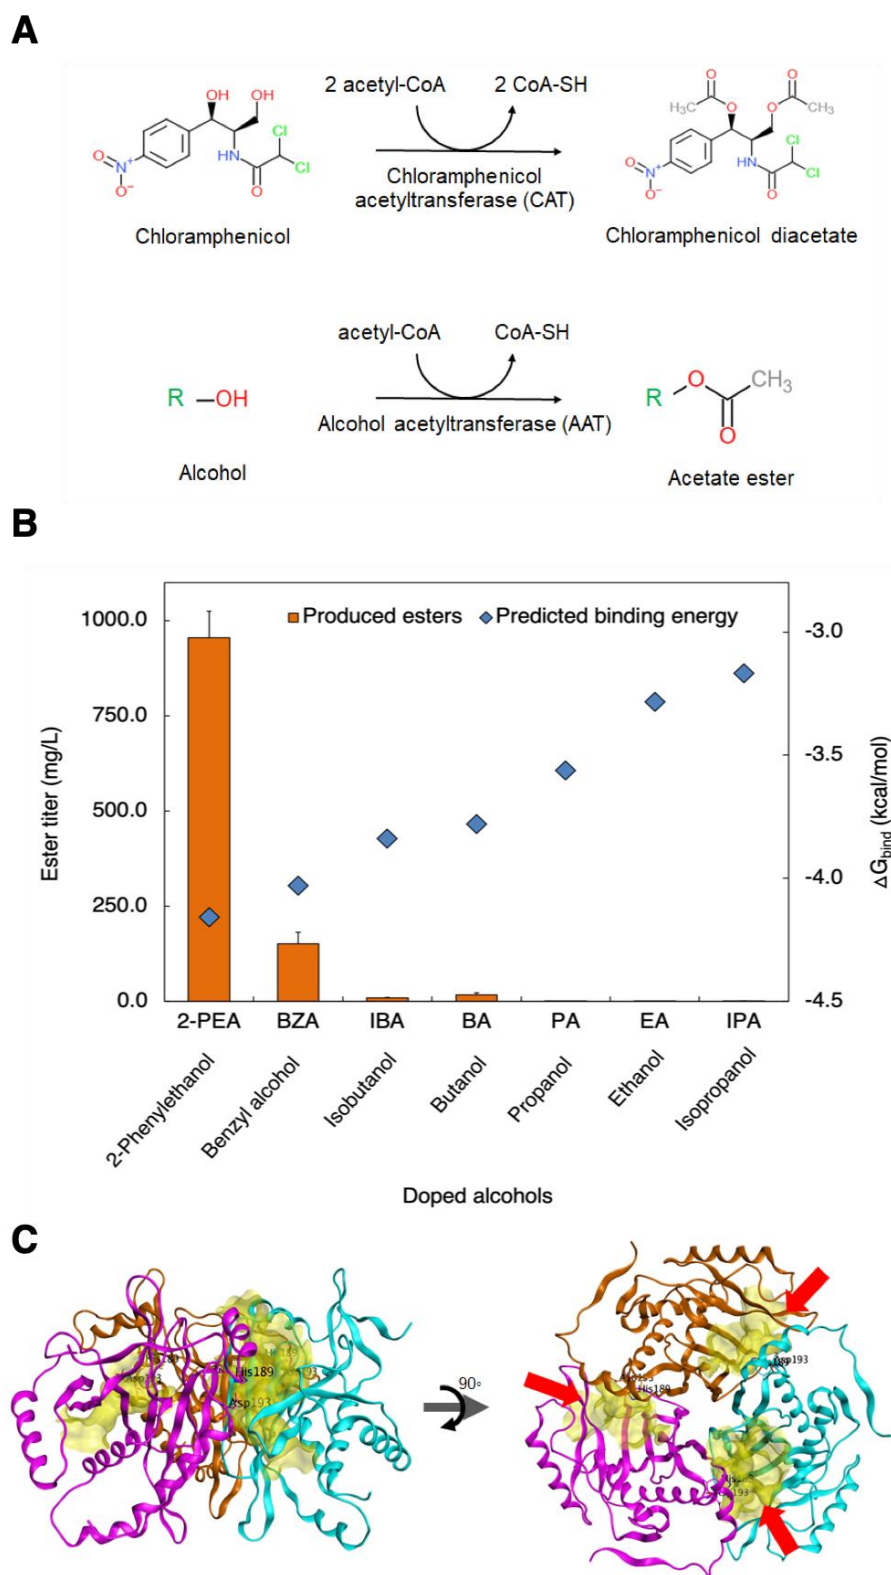

672

673 **Figure 2**

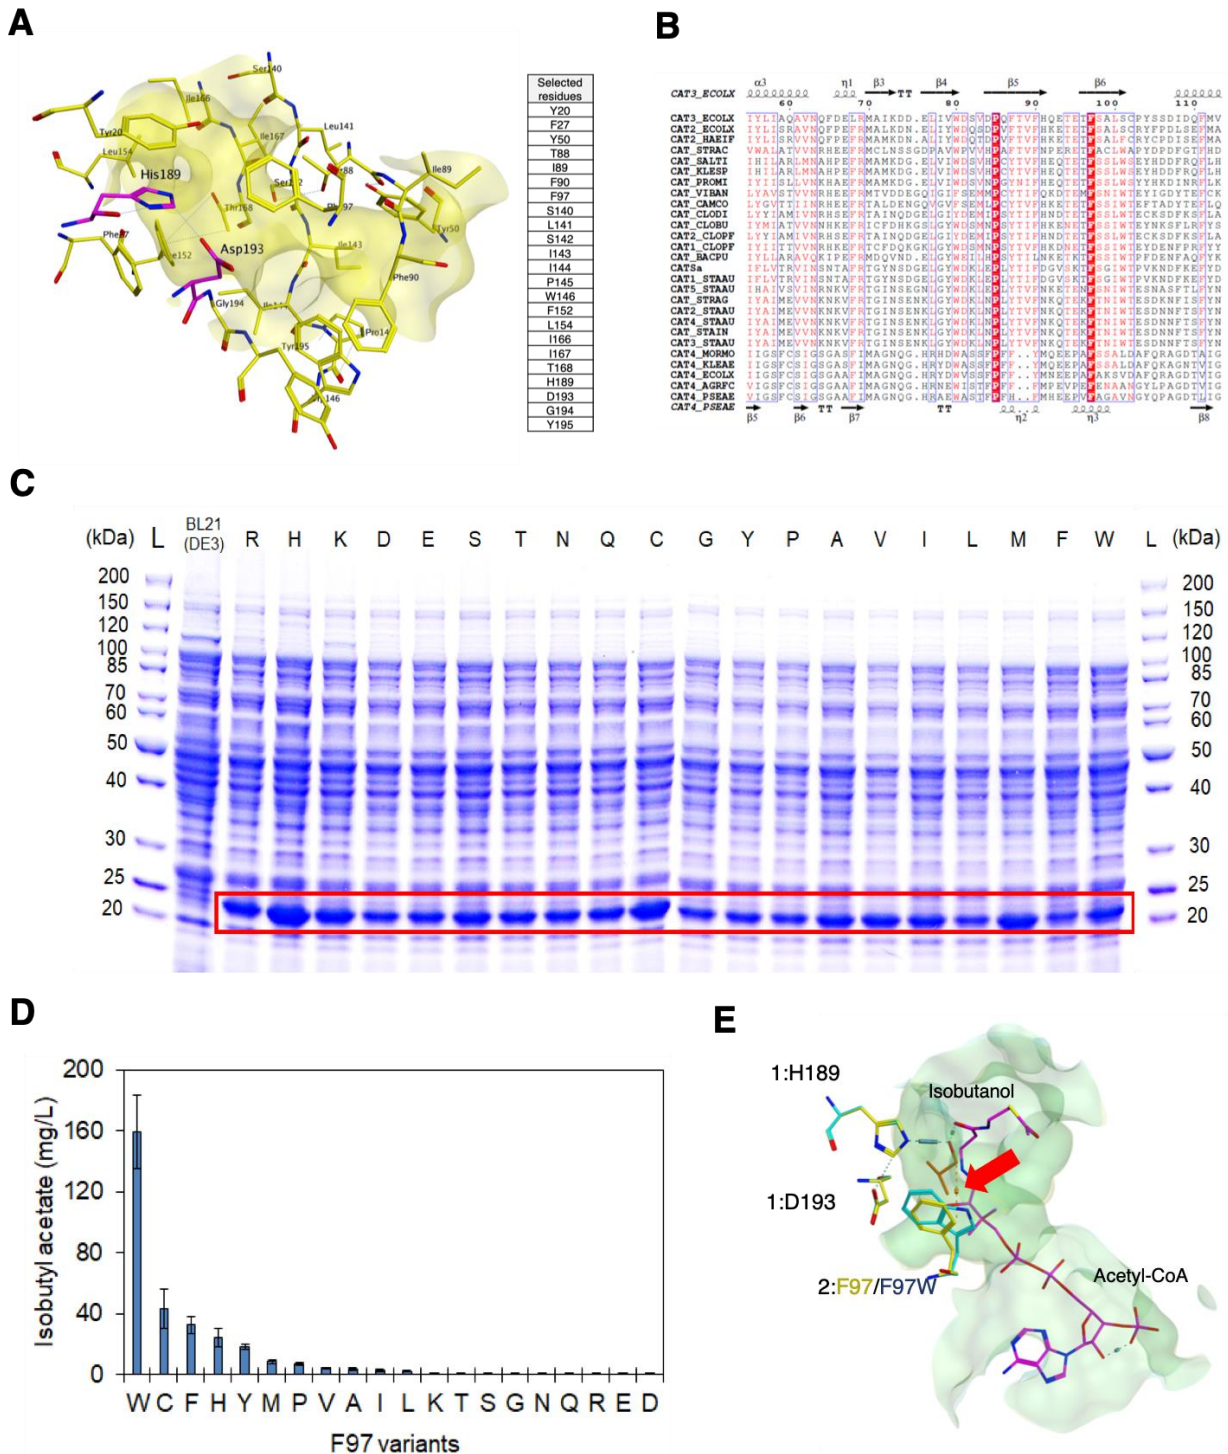

674

675

676

677 **Figure 3**

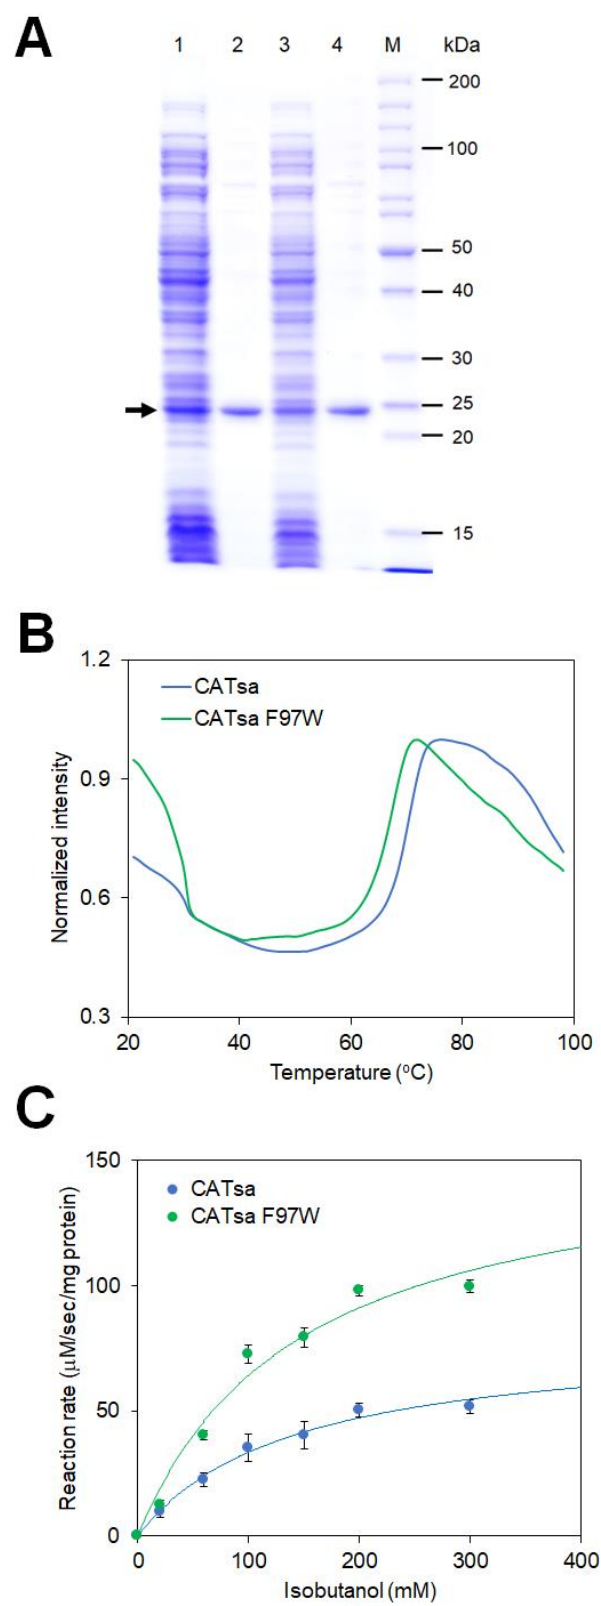

678

679 **Figure 4**

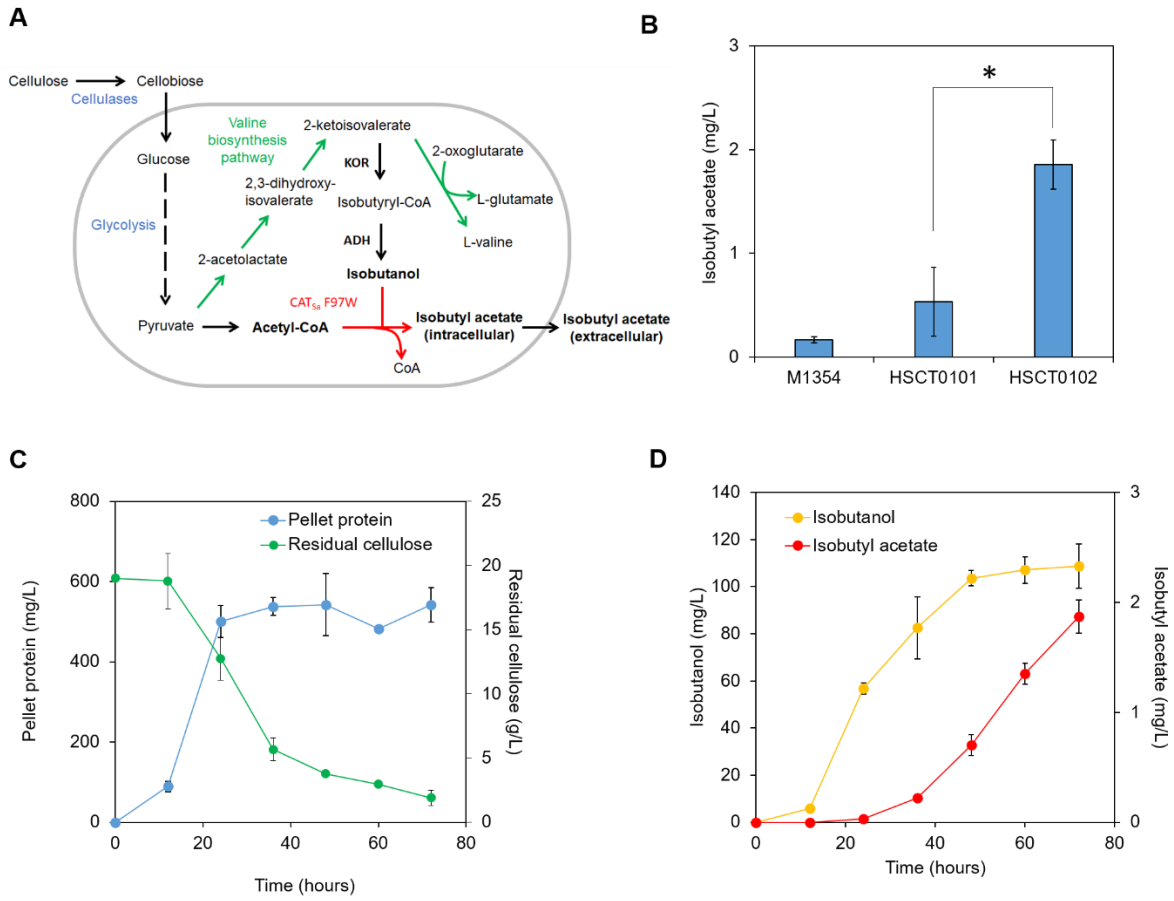

680

681

682

683

684
